# Supplementary material for: Fast and Reliable Determination of Phthalic Acid Esters in the Blood of Marine Turtles by Means of Solid Phase Extraction Coupled with Gas Chromatography-Ion Trap/Mass Spectrometry
Source: MDPI journal article supplement (doi:10.3390/toxics9110279), 2021-10-22
Supplement: s1 [file s1]

# Supplementary Materials: Fast and Reliable Determination of Phthalic Acid Esters in the Blood of Marine Turtles by means of Solid Phase Extraction coupled with Gas Chromatography-Ion Trap/Mass Spectrometry

Ivan Notardonato, Cristina Di Fiore, Alessia Iannone, Mario Vincenzo Russo, Monica Francesca Blasi, Gabriele Favero, Daniela Mattei, Carmela Protano, Matteo Vitali and Pasquale Avino

**Table S1.** Phthalates (PAEs) investigated in this paper, with their corresponding abbreviations, chemical structure, CAS number, chemical formula, molecular weight (MW) and Selected Ion Monitoring (SIM).

| Phthalate                     | Abbreviation | CAS number | Chemical structure                                                                   | Formula                                        | MW     |
|-------------------------------|--------------|------------|--------------------------------------------------------------------------------------|------------------------------------------------|--------|
| Dimethyl phthalate            | DMP          | 131-113    | 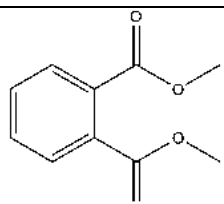   | C <sub>10</sub> H <sub>10</sub> O <sub>4</sub> | 194.18 |
| Diethyl phthalate             | DEP          | 84-66-2    |   | C <sub>12</sub> H <sub>14</sub> O <sub>4</sub> | 222.24 |
| Di- <i>isobutyl</i> phthalate | DiBP         | 84-69-5    |  | C <sub>16</sub> H <sub>22</sub> O <sub>4</sub> | 278.34 |
| <i>n</i> -Dibutyl phthalate   | DBP          | 84-74-2    |  | C <sub>16</sub> H <sub>22</sub> O <sub>4</sub> | 278.34 |
| Bis-(2-ethylhexyl) phthalate  | DEHP         | 117-81-7   |  | C <sub>24</sub> H <sub>38</sub> O <sub>4</sub> | 390.56 |
| Di-octyl phthalate            | DnOP         | 117-84-0   |  | C <sub>24</sub> H <sub>38</sub> O <sub>4</sub> | 390.56 |
